# Supplementary material for: Efficient fluorescent OLEDS based on assistant acceptor modulated HLCT emissive state for enhancing singlet exciton utilization
Source: Royal Society of Chemistry journal article supplement (doi:10.1039/d0ra00658k), 2020-01-01
Supplement: d0ra00658k1.pdf [file d0ra00658k1.pdf]

## Supporting information

**“Efficient fluorescent OLEDs based on assistant acceptor modulated HLCT emissive state for enhancing singlet Exciton Utilization”**

**Jayaraman Jayabharathi\*, Jagathratchagan Anudeebhana, Venugopal Thanikachalam, Sekar Sivaraj**

*Department of Chemistry, Annamalai University, Annamalai nagar, Tamilnadu- 608 002, India*

\* Address for correspondence

Dr. J. Jayabharathi  
Professor of Chemistry  
Department of Chemistry  
Annamalai University  
Annamalai nagar 608 002  
Tamilnadu, India.  
Tel: +91 9443940735  
E-mail: jtchalam2005@yahoo.co.in

## **Contents**

**SI-I: Figures**

**SI-II: Charge-Transfer indexes**

**SI-III: Tables**

**Scheme S1.** Synthetic route of DDPPPA and DDPBA.

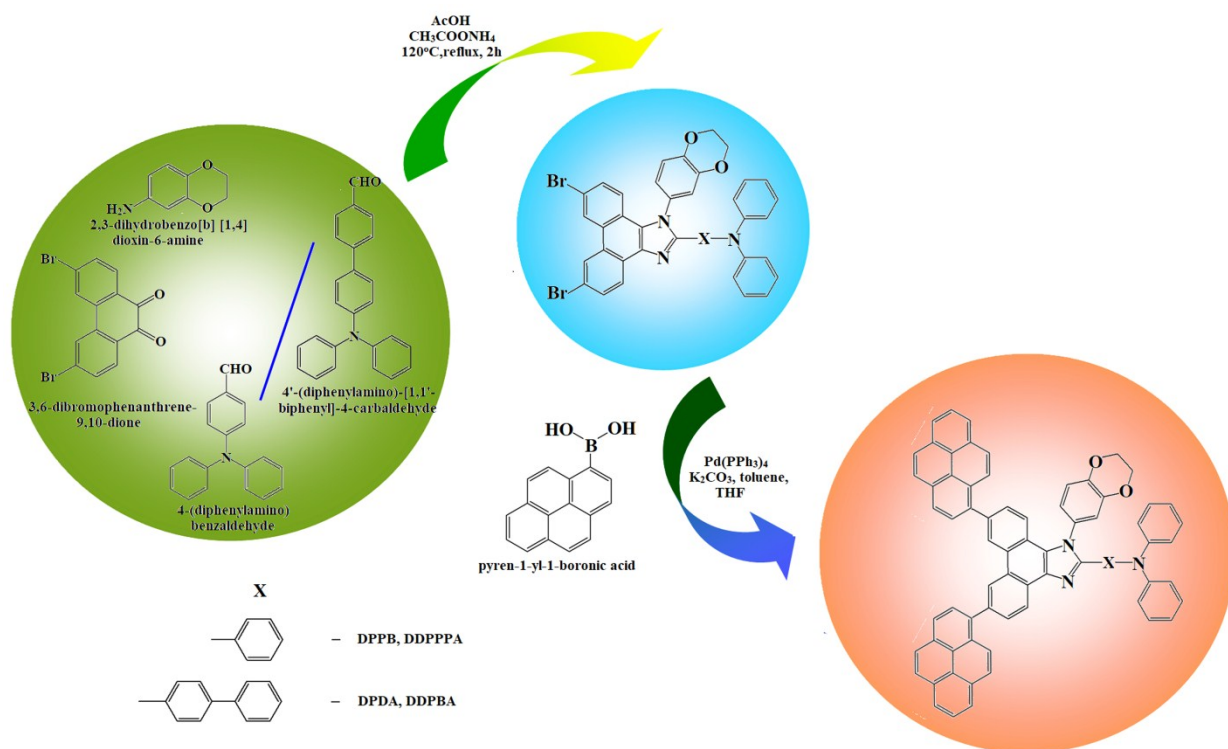

## SI-I: Figures

Figure S1. Normalized emission spectra of a) DDPPPA and b) DDPBA.

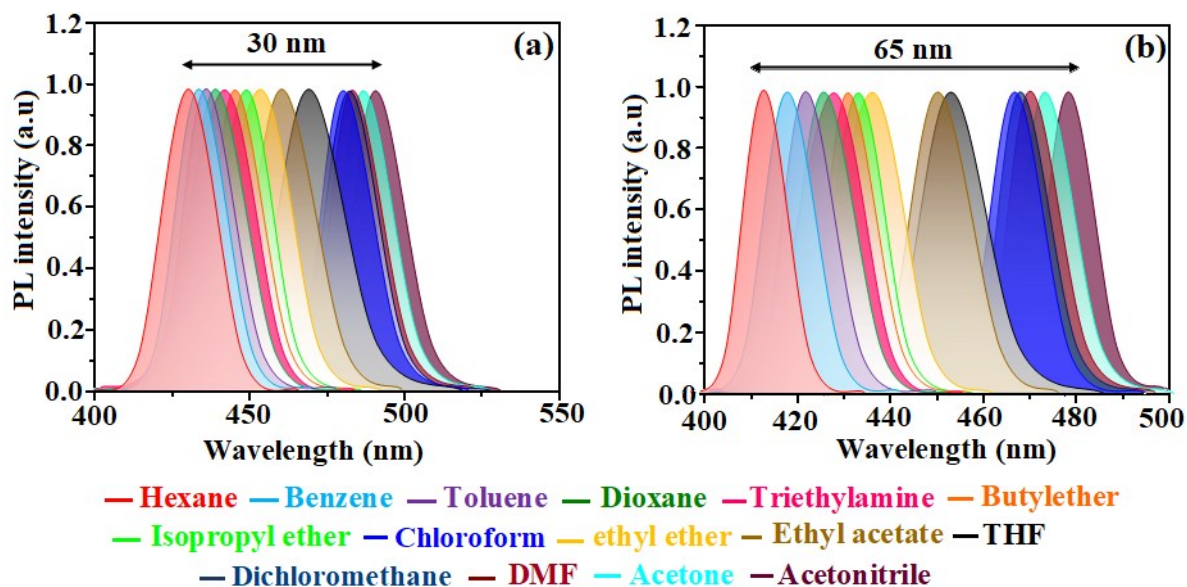

## SI-II: Charge-Transfer indexes

The hole-particle pair interactions have been related to the distance covered during the excitations one possible descriptor  $\Delta r$  index could be used to calculate the average distance which is weighted in function of the excitation coefficients.

$$\Delta r = \frac{\sum_{ia} k_{ia}^2 |\langle \varphi_a | r | \varphi_a \rangle - \langle \varphi_i | r | \varphi_i \rangle|}{\sum_{ia} K_{ia}^2} \dots\dots\dots (S1)$$

Where  $|\langle \varphi_i | r | \varphi_i \rangle|$  is the norm of the orbital centroid [1–4].  $\Delta r$ -index will be expressed in Å.

The density variation associated to the electronic transition is given by

$$\Delta \rho(r) = \rho_{EX}(r) - \rho_{GS}(r) \dots\dots\dots (S2)$$

Where  $\rho_{GS}(r)$  and  $\rho_{EX}(r)$  are the electronic densities of to the ground and excited states, respectively. Two functions,  $\rho_+(r)$  and  $\rho_-(r)$ , corresponds to the points in space where an increment or a depletion of the density upon absorption is produced and they can be defined as follows:

$$\rho_+(r) = \begin{cases} \Delta \rho(r) & \text{if } \Delta \rho(r) > 0 \\ 0 & \text{if } \Delta \rho(r) < 0 \end{cases} \dots\dots\dots (S3)$$

$$\rho_-(r) = \begin{cases} \Delta \rho(r) & \text{if } \Delta \rho(r) < 0 \\ 0 & \text{if } \Delta \rho(r) > 0 \end{cases} \dots\dots\dots (S4)$$

The barycenters of the spatial regions  $R_+$  and  $R_-$  are related with  $\rho_+(r)$  and  $\rho_-(r)$  and are shown as

$$R_+ = \frac{\int r \rho_+(r) dr}{\int \rho_+(r) dr} = (x_+, y_+, z_+) \dots\dots\dots (S5)$$

$$R_- = \frac{\int r \rho_-(r) dr}{\int \rho_-(r) dr} = (x_-, y_-, z_-) \dots\dots\dots (S6)$$

The spatial distance ( $D_{CT}$ ) between the two barycenters  $R_+$  and  $R_-$  of density distributions can thus be used to measure the CT excitation length

$$D_{CT} = |R_+ - R_-| \dots\dots\dots (S7)$$

The transferred charge ( $q_{CT}$ ) can be obtained by integrating over all space  $\rho_+ (\rho_-)$ ,. Variation in dipole moment between the ground and the excited states ( $\mu_{CT}$ ) can be computed by the following relation:

$$\|\mu_{CT}\| = D_{CT} \int \rho_+(r) dr = D_{CT} \int \rho_-(r) dr \dots\dots\dots (S8)$$

$$= D_{CT} q_{CT} \dots\dots\dots (S9)$$

The difference between the dipole moments  $\|\mu_{CT}\|$  have been computed for the ground and the excited states  $\Delta\mu_{ES-GS}$ . The two centroids of charges ( $C^+/C^-$ ) associated to the positive and negative density regions are calculated as follows. First the root-mean-square deviations along the three axis ( $\sigma_{aj}$ ,  $j = x, y, z$ ;  $a = +$  or  $-$ ) are computed as

$$\sigma_{a,j} = \sqrt{\frac{\sum_i \rho_a(r_i) (j_i - j_a)^2}{\sum_i \rho_a(r_i)}} \dots\dots\dots (S10)$$

The two centroids ( $C_+$  and  $C_-$ ) are defined as

$$C_+(r) = A_+ e \left( -\frac{(x - x_+)^2}{2\sigma_{+x}^2} - \frac{(y - y_+)^2}{2\sigma_{+y}^2} - \frac{(z - z_+)^2}{2\sigma_{+z}^2} \right) \dots\dots\dots (S11)$$

$$C_-(r) = A_- e \left( -\frac{(x - x_-)^2}{2\sigma_{-x}^2} - \frac{(y - y_-)^2}{2\sigma_{-y}^2} - \frac{(z - z_-)^2}{2\sigma_{-z}^2} \right) \dots\dots\dots (S12)$$

The normalization factors ( $A_+$  and  $A_-$ ) are used to impose the integrated charge on the centroid to be equal to the corresponding density change integrated in the whole space:

$$A_+ = \frac{\int \rho_+(r) dr}{\int e\left(-\frac{(x-x_-)^2}{2\sigma_{+x}^2} - \frac{(y-y_-)^2}{2\sigma_{+y}^2} - \frac{(z-z_-)^2}{2\sigma_{+z}^2}\right) dr} \dots\dots\dots (S13)$$

$$A_- = \frac{\int \rho_-(r) dr}{\int e\left(-\frac{(x-x_-)^2}{2\sigma_{-x}^2} - \frac{(y-y_-)^2}{2\sigma_{-y}^2} - \frac{(z-z_-)^2}{2\sigma_{-z}^2}\right) dr} \dots\dots\dots (S14)$$

H index is defined as half of the sum of the centroids axis along the D–A direction, if the D–A direction is along the X axis, H is defined by the relation:

$$H = \frac{\sigma_{+x} + \sigma_{-x}}{2} \dots\dots\dots (S15)$$

The centroid along X axis is expected. The t index represents the difference between  $D_{CT}$  and H:

$$t = D_{CT} - H \dots\dots\dots (S16)$$

**Figure S2.** Natural transition orbital pairs with transition character analysis for singlet states ( $S_1$ - $S_{10}$ ) of (HONTOs and LUNTOs) DDPPPA [ $f$ -oscillator strength and % weights of

hole-particle].

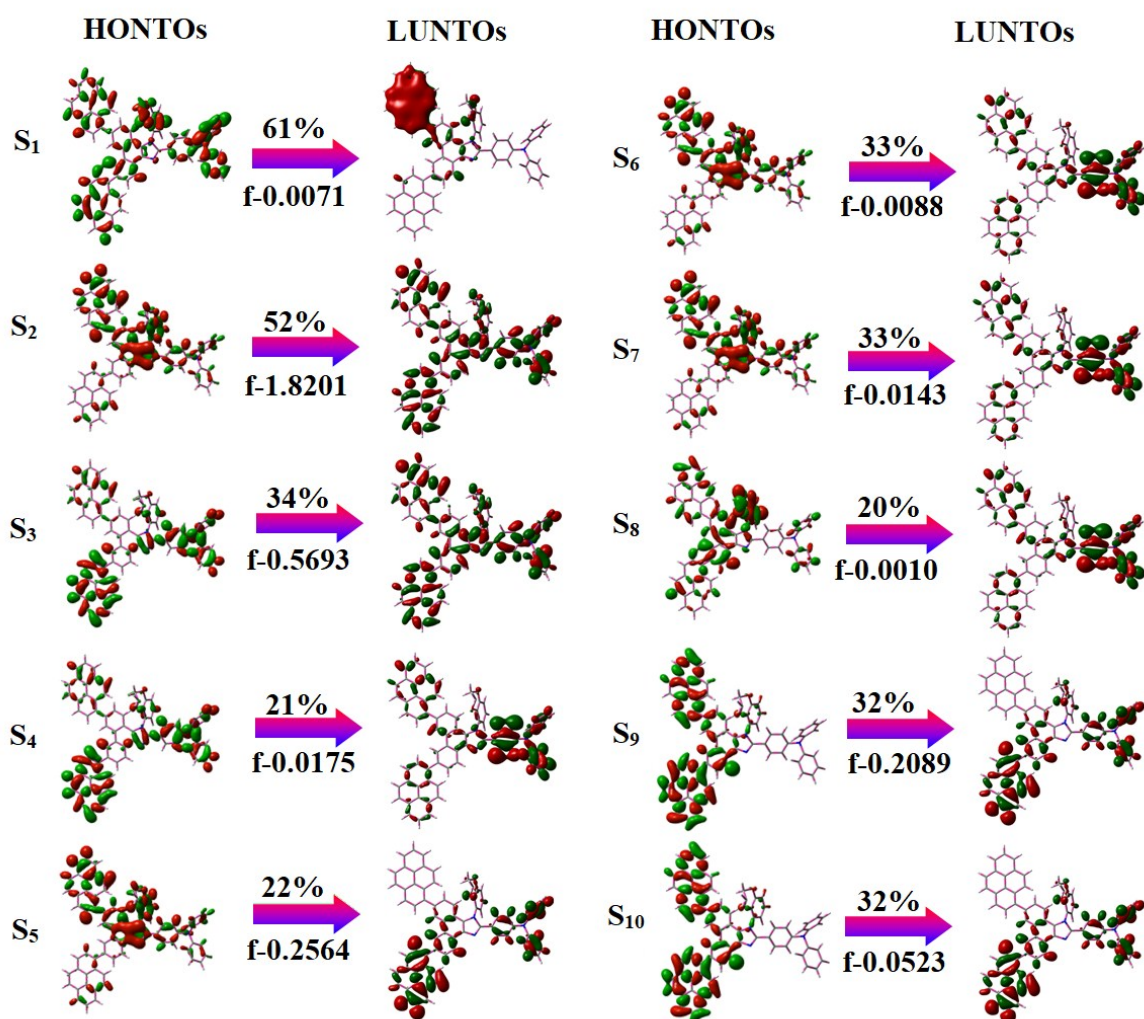



**Figure S3.** Natural transition orbital pairs with (HONTOs and LUNTOs) transition character analysis for singlet states ( $S_1$ - $S_{10}$ ) of DDPBA [ $f$ -oscillator strength and % weights of hole-particle].

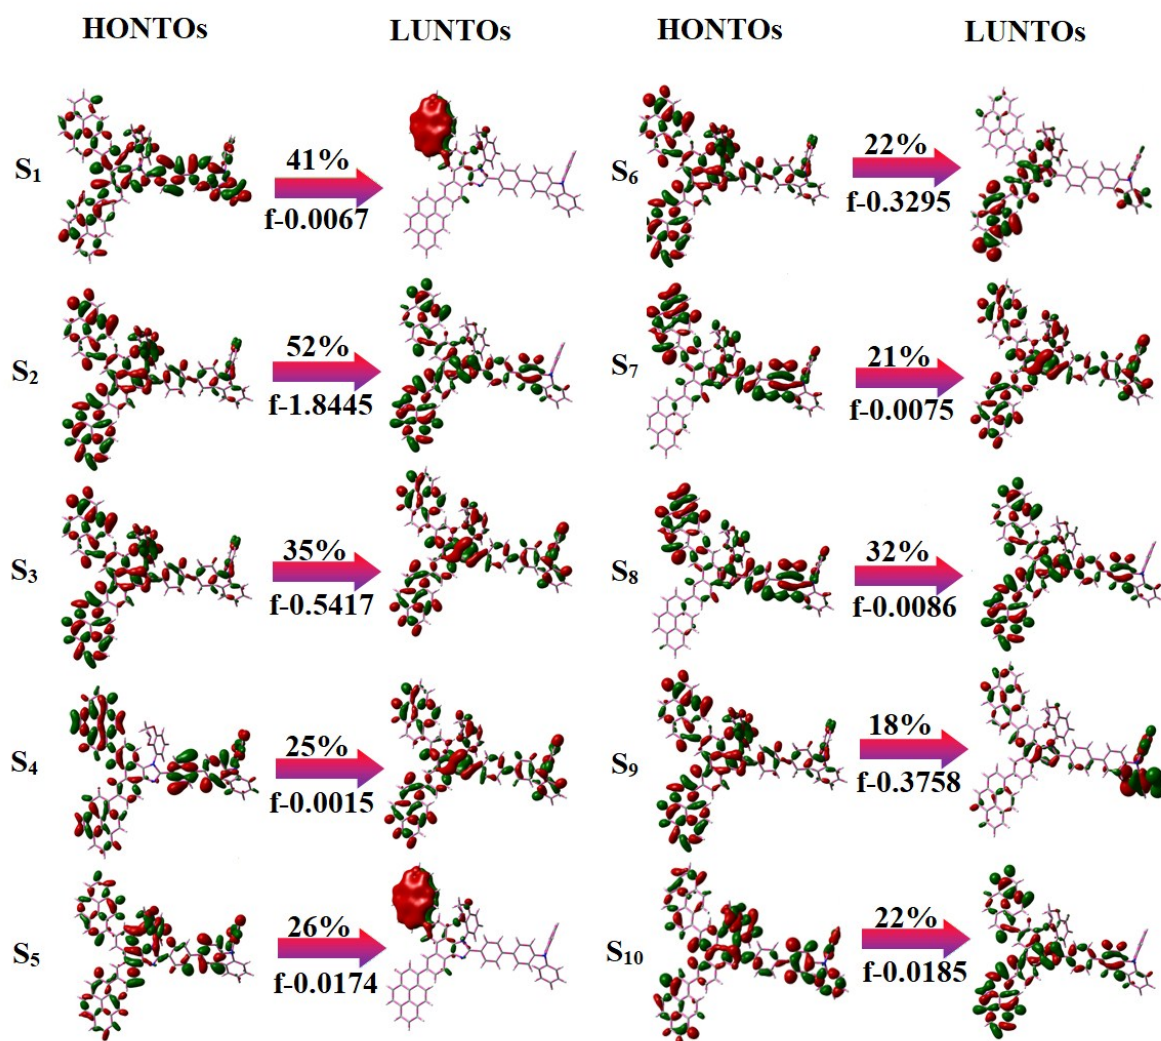

**Figure S4.** Scheme of exciton decay process after hole and electron recombination in OLEDs of D- $\pi$ -A molecules.

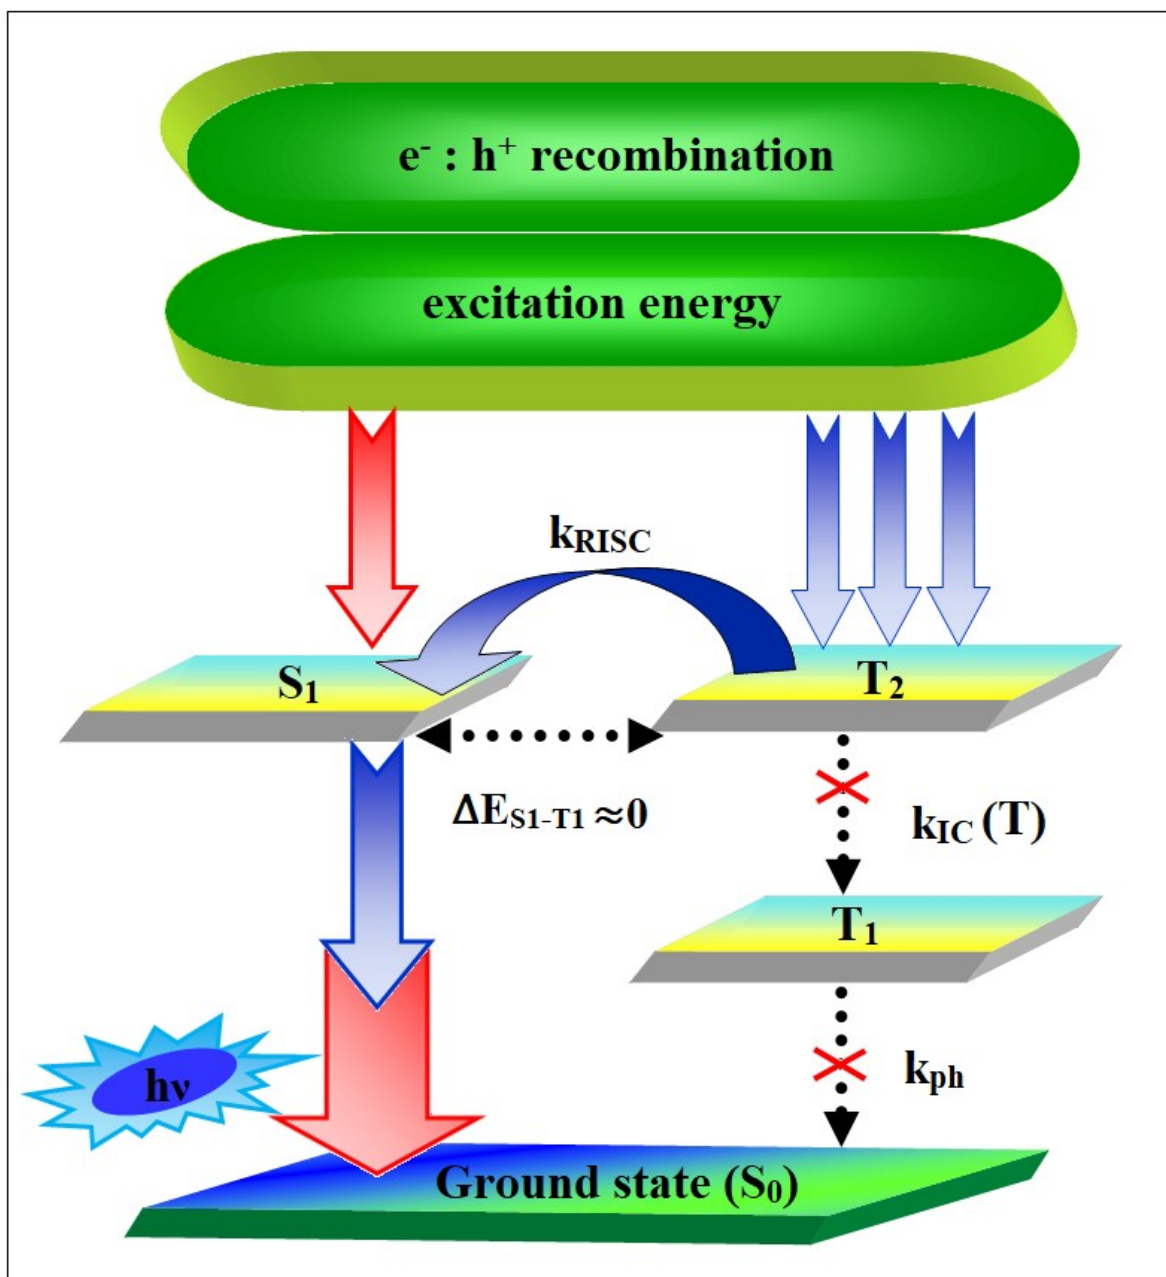

**Figure S5.** (a) Reverse intersystem crossing; (b) Hybridization process of LE and CT states of DDPPPA and DDPBA.

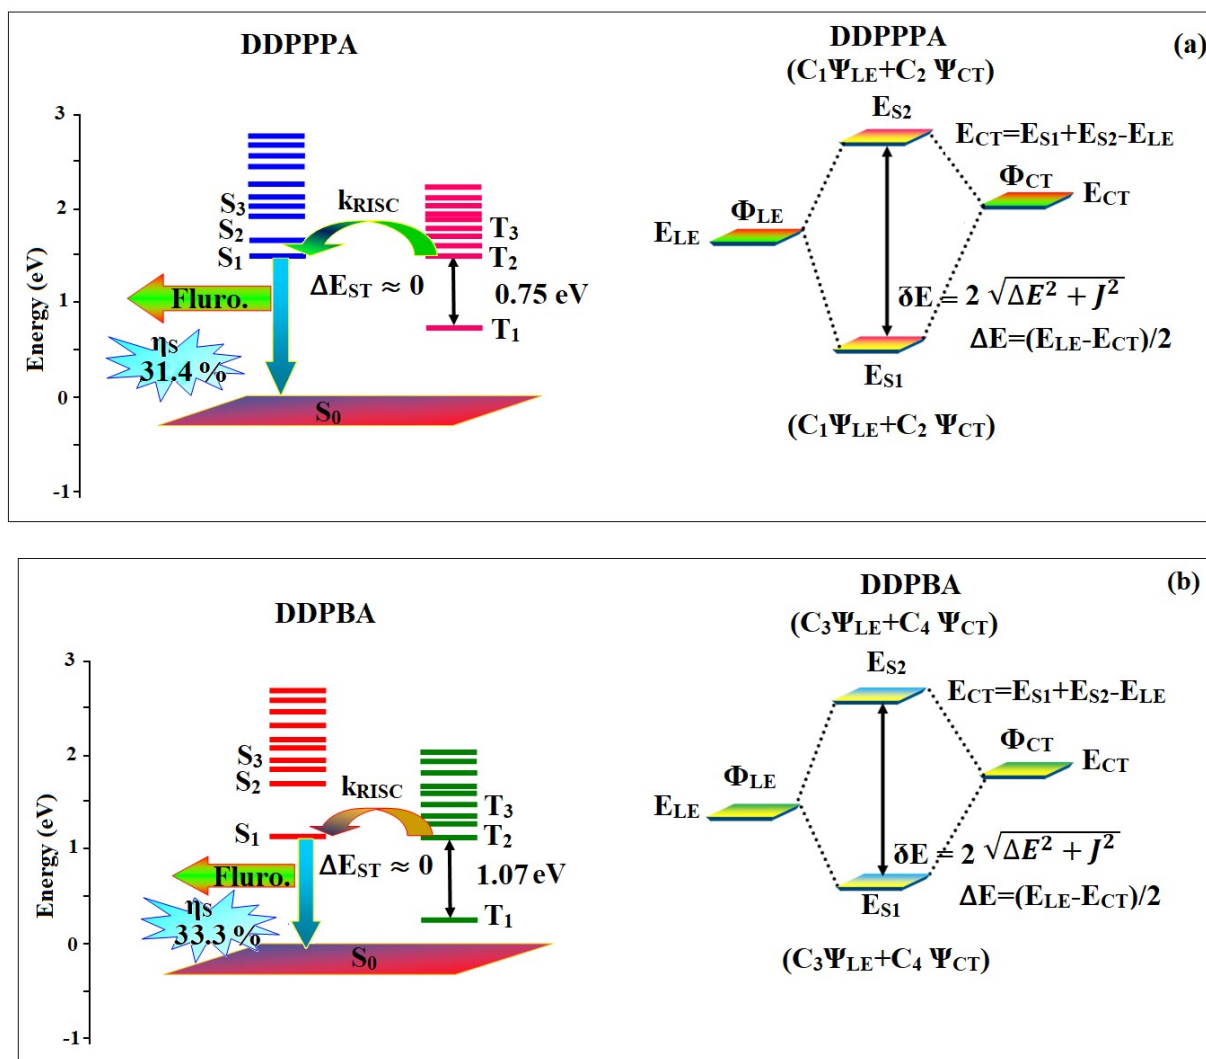

**Figure S6.** Hole and particle distribution [green - increasing electron density and blue - decreasing electron density and Contour plots of transition density matrices (TDM) of DDPPPA for [ $S_1$ - $S_4$  states: density=transition= $n$  /IOp(6/8=3)].

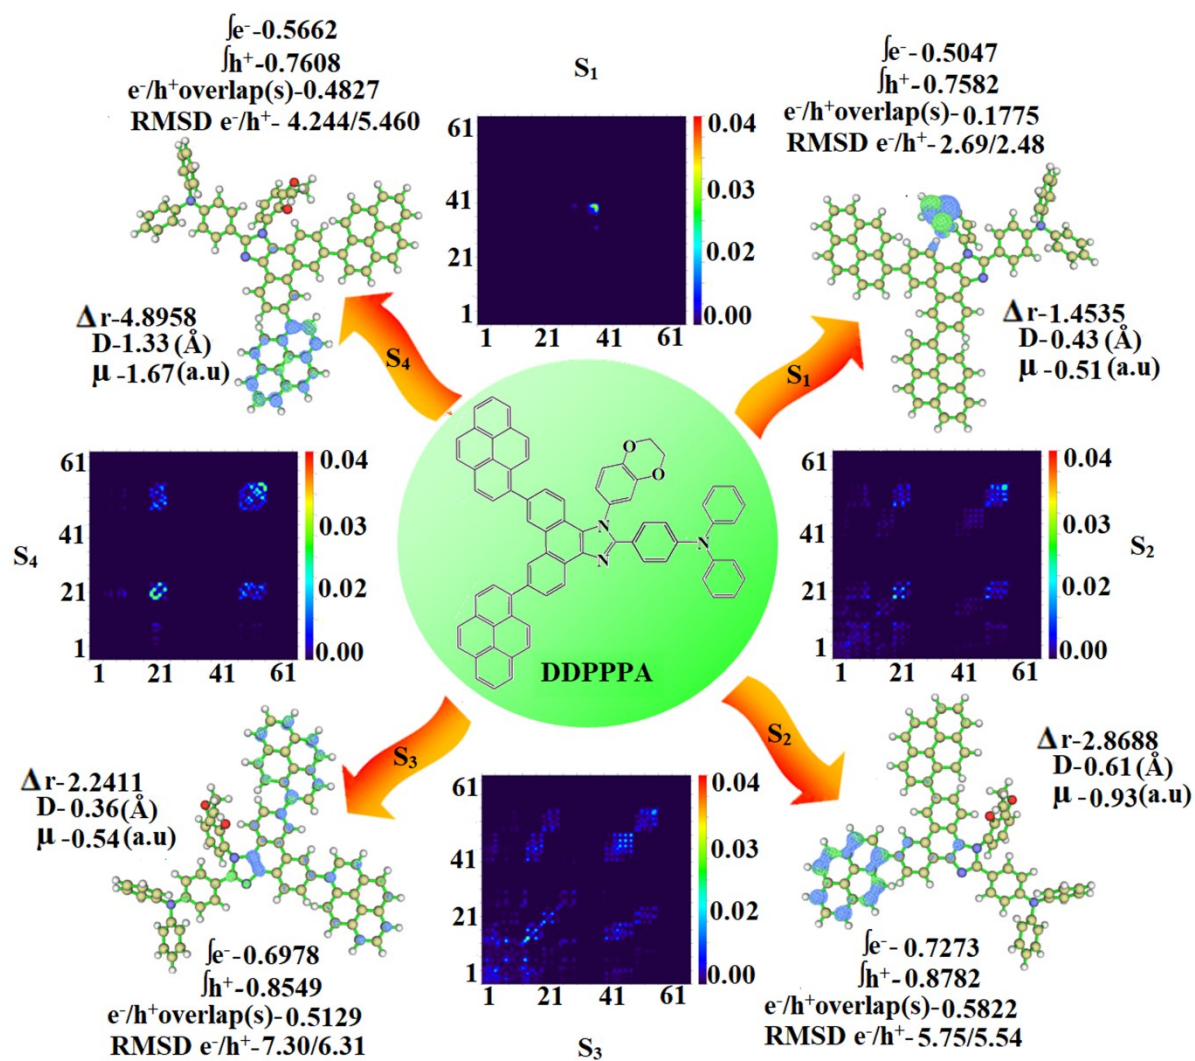

**Figure S7.** Hole and particle distribution green - increasing electron density and blue - decreasing electron density and Contour plots of transition density matrices (TDM) of DDPBA for [S<sub>1</sub>-S<sub>4</sub> states: density=transition=n /IOp(6/8=3)].

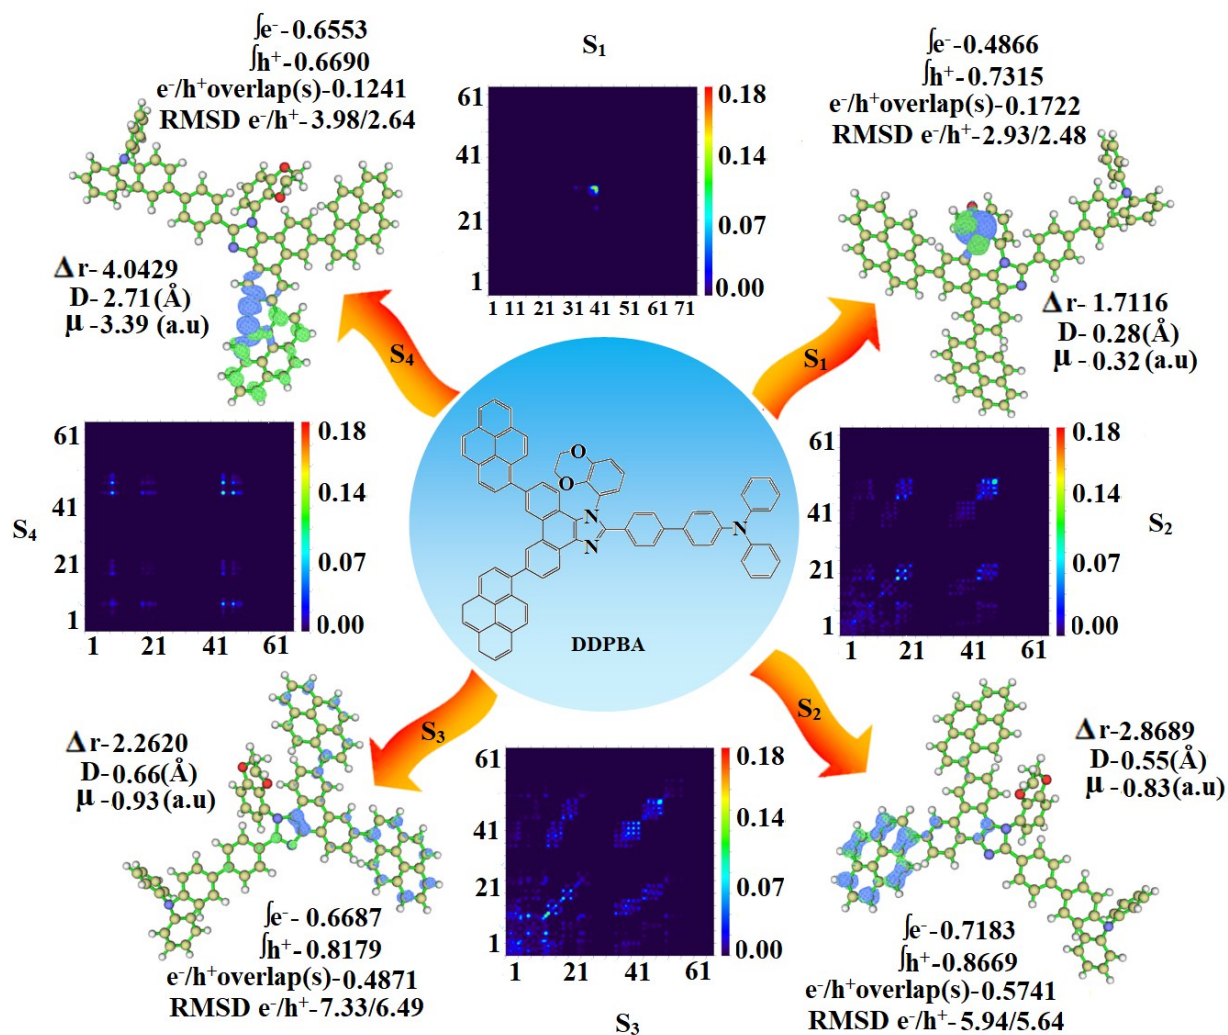

**Figure S8.** Graphical representation of  $D_{CT}$  and centroid of charges [ $C^+(r) / C^-(r)$ ; isosurface for DDPPPA and for DDPBA (0.1 a.u.)]

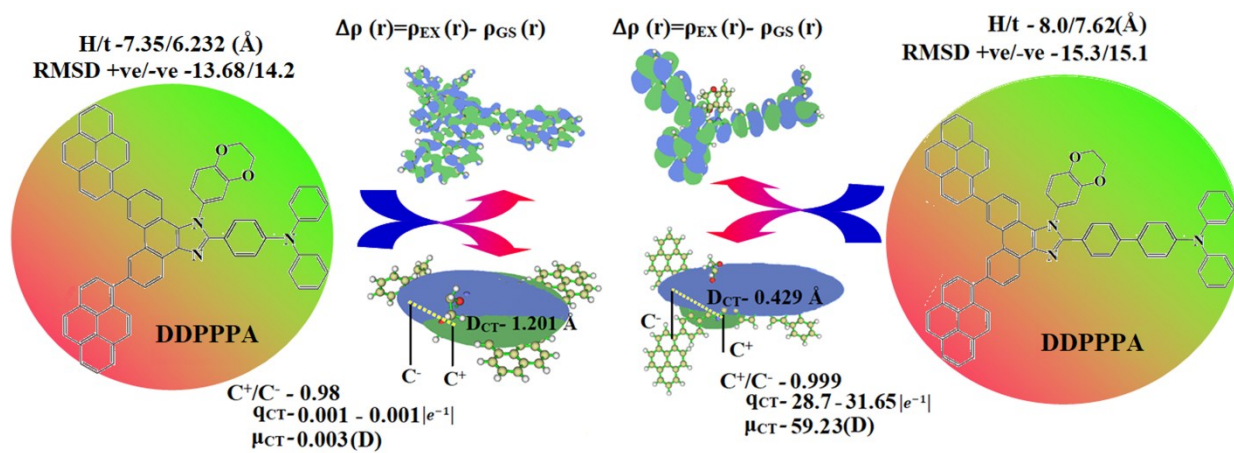

**Figure S9.** Potential energy surface scan (PES) diagram of (a) DDPPPA and DDPBA; (b) Potential energy scan (PES) of  $S_1$ - $S_3$  excited states of (b) DDPPPA and (c) DDPBA with increasing solvent polarity.

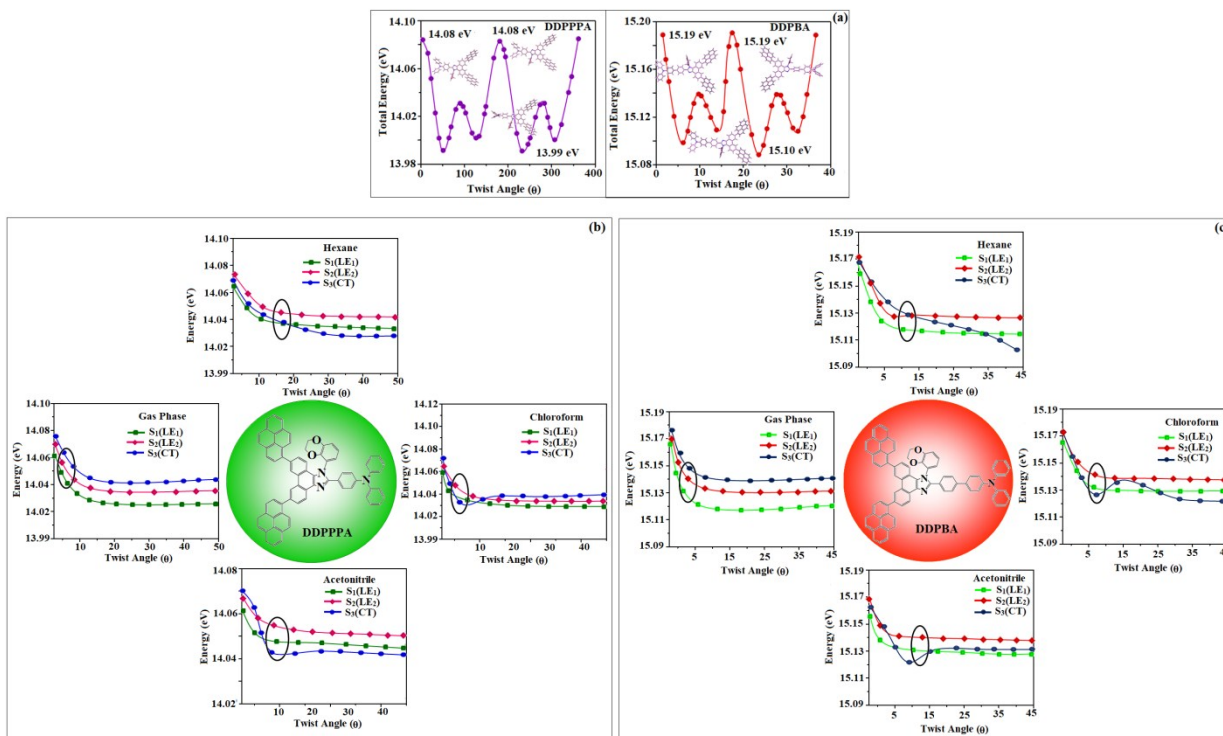

### SI–III: Tables

**Table S1:** Photophysical properties of DDPPPA in different solvents.

| Solvents          | $\epsilon$ | $n$  | $f(\epsilon, n)$ | $\lambda_{ab}$<br>(nm) | $\nu_{ab}$<br>( $\text{cm}^{-1}$ ) | $\lambda_{flu}$<br>(nm) | $\nu_{flu}$<br>( $\text{cm}^{-1}$ ) | $\nu_{ss}$<br>( $\text{cm}^{-1}$ ) |
|-------------------|------------|------|------------------|------------------------|------------------------------------|-------------------------|-------------------------------------|------------------------------------|
| Hexane            | 1.88       | 1.37 | 0.0004           | 345                    | 28985.51                           | 430                     | 23255.81                            | 5729.69                            |
| Benzene           | 2.28       | 1.43 | 0.0266           | 348                    | 28735.63                           | 432                     | 23148.15                            | 5587.48                            |
| Toluene           | 2.38       | 1.49 | 0.014            | 346                    | 28901.73                           | 435                     | 22988.51                            | 5913.23                            |
| Dioxane           | 2.22       | 1.42 | 0.0214           | 344                    | 29069.77                           | 438                     | 22831.05                            | 6238.72                            |
| Triethylamine     | 2.42       | 1.40 | 0.048            | 345                    | 28985.51                           | 440                     | 22727.27                            | 6258.23                            |
| Butylether        | 3.08       | 1.39 | 0.096            | 347                    | 28818.44                           | 444                     | 22522.52                            | 6295.92                            |
| Isopropylether    | 3.88       | 1.37 | 0.145            | 344                    | 29069.77                           | 449                     | 22271.71                            | 6798.05                            |
| Chloroform        | 4.81       | 1.45 | 0.148            | 342                    | 29069.77                           | 480                     | 22123.89                            | 6945.87                            |
| Ethyl ether       | 4.34       | 1.35 | 0.167            | 345                    | 28985.51                           | 450                     | 22222.22                            | 6763.28                            |
| Ethyl acetate     | 6.09       | 1.41 | 0.1866           | 341                    | 29325.51                           | 460                     | 21739.13                            | 7586.38                            |
| Tetrahydrofuran   | 7.52       | 1.40 | 0.2096           | 341                    | 29325.51                           | 469                     | 21321.96                            | 8003.55                            |
| dichloromethane   | 9.08       | 1.42 | 0.2183           | 344                    | 29239.77                           | 481                     | 20833.33                            | 8406.43                            |
| Dimethylformamide | 36.7       | 1.43 | 0.276            | 344                    | 29069.77                           | 482                     | 20746.89                            | 8322.88                            |
| Acetone           | 21.01      | 1.35 | 0.2847           | 341                    | 29325.51                           | 486                     | 20576.13                            | 8749.38                            |
| Acetonitrile      | 37.5       | 1.34 | 0.3053           | 340                    | 29411.76                           | 490                     | 20408.16                            | 9003.60                            |



**Table S2:** Photophysical properties of DDPBA in different solvents.

| <b>Solvents</b>   | <b><math>\epsilon</math></b> | <b>n</b> | <b>f(<math>\epsilon, n</math>)</b> | <b><math>\lambda_{ab}</math><br/>(nm)</b> | <b><math>\nu_{ab}</math><br/>(<math>\text{cm}^{-1}</math>)</b> | <b><math>\lambda_{flu}</math><br/>(nm)</b> | <b><math>\nu_{flu}</math><br/>(<math>\text{cm}^{-1}</math>)</b> | <b><math>\nu_{ss}</math><br/>(<math>\text{cm}^{-1}</math>)</b> |
|-------------------|------------------------------|----------|------------------------------------|-------------------------------------------|----------------------------------------------------------------|--------------------------------------------|-----------------------------------------------------------------|----------------------------------------------------------------|
| Hexane            | 1.88                         | 1.37     | 0.0004                             | 330                                       | 30303.03                                                       | 415                                        | 24096.39                                                        | 6206.64                                                        |
| Benzene           | 2.28                         | 1.426    | 0.0266                             | 334                                       | 29940.12                                                       | 420                                        | 23809.52                                                        | 6130.59                                                        |
| Toluene           | 2.38                         | 1.494    | 0.014                              | 335                                       | 29850.75                                                       | 424                                        | 23584.91                                                        | 6265.84                                                        |
| Dioxane           | 2.22                         | 1.422    | 0.0214                             | 334                                       | 29940.12                                                       | 428                                        | 23364.49                                                        | 6575.63                                                        |
| Triethylamine     | 2.42                         | 1.401    | 0.048                              | 332                                       | 30120.48                                                       | 430                                        | 23255.81                                                        | 6864.67                                                        |
| Butylether        | 3.08                         | 1.399    | 0.096                              | 332                                       | 30120.48                                                       | 433                                        | 23094.69                                                        | 7025.79                                                        |
| Isopropylether    | 3.88                         | 1.368    | 0.145                              | 330                                       | 30303.03                                                       | 435                                        | 22988.51                                                        | 7314.52                                                        |
| Chloroform        | 4.81                         | 1.446    | 0.1482                             | 334                                       | 29940.12                                                       | 469                                        | 22935.78                                                        | 7004.34                                                        |
| Ethyl ether       | 4.34                         | 1.352    | 0.167                              | 329                                       | 30395.14                                                       | 455                                        | 21978.02                                                        | 8417.11                                                        |
| Ethyl acetate     | 6.09                         | 1.413    | 0.1866                             | 330                                       | 30303.03                                                       | 438                                        | 22831.05                                                        | 7471.98                                                        |
| Tetrahydrofuran   | 7.52                         | 1.40     | 0.2096                             | 333                                       | 30030.03                                                       | 452                                        | 22123.89                                                        | 7906.14                                                        |
| Dichloromethane   | 9.08                         | 1.42     | 0.2183                             | 334                                       | 29940.12                                                       | 470                                        | 21321.96                                                        | 8618.16                                                        |
| Dimethylformamide | 36.7                         | 1.427    | 0.276                              | 338                                       | 29585.8                                                        | 472                                        | 21186.44                                                        | 8399.36                                                        |
| Acetone           | 21.01                        | 1.35     | 0.2847                             | 335                                       | 29850.75                                                       | 475                                        | 21052.63                                                        | 8798.11                                                        |
| Acetonitrile      | 37.5                         | 1.34     | 0.3053                             | 332                                       | 30120.48                                                       | 480                                        | 20833.33                                                        | 9287.15                                                        |

**Table S3.** Computed [zindo (Singlet or Triplet, n states=10)] singlet ( $E_S$ ) and triplet ( $E_T$ ) energies (eV), oscillator strength ( $f$ ), dipole moment ( $\mu$ , D) and singlet-triplet splitting ( $\Delta E_{ST}$ , eV) of DDPPPA from NTOs.

| Energy level | $E_S$ | Oscillator strength ( $f$ ) | $\mu$ | NTO Transitions                         | $E_T$ | $\Delta E_{ST}$ | NTO Transitions                         |
|--------------|-------|-----------------------------|-------|-----------------------------------------|-------|-----------------|-----------------------------------------|
| 1            | 1.48  | 0.0071                      | 0.51  | <sup>61%</sup><br>177 $\rightarrow$ 196 | 0.71  | 0.77            | <sup>24%</sup><br>182 $\rightarrow$ 184 |
| 2            | 1.69  | 1.8201                      | 0.93  | <sup>52%</sup><br>182 $\rightarrow$ 183 | 1.47  | 0.22            | <sup>22%</sup><br>181 $\rightarrow$ 183 |
| 3            | 1.88  | 0.5693                      | 0.54  | <sup>34%</sup><br>181 $\rightarrow$ 183 | 1.59  | 0.29            | <sup>21%</sup><br>182 $\rightarrow$ 183 |
| 4            | 2.05  | 0.0175                      | 1.67  | <sup>21%</sup><br>181 $\rightarrow$ 184 | 1.69  | 0.36            | <sup>21%</sup><br>182 $\rightarrow$ 183 |
| 5            | 2.26  | 0.2564                      | 2.56  | <sup>22%</sup><br>182 $\rightarrow$ 185 | 1.77  | 0.49            | <sup>21%</sup><br>182 $\rightarrow$ 183 |
| 6            | 2.35  | 0.0088                      | 0.66  | <sup>33%</sup><br>182 $\rightarrow$ 184 | 1.86  | 0.49            | <sup>24%</sup><br>182 $\rightarrow$ 184 |
| 7            | 2.48  | 0.0143                      | 0.21  | <sup>33%</sup><br>182 $\rightarrow$ 184 | 1.92  | 0.56            | <sup>61%</sup><br>177 $\rightarrow$ 196 |
| 8            | 2.55  | 0.0010                      | 3.64  | <sup>20%</sup><br>174 $\rightarrow$ 184 | 2.01  | 0.54            | <sup>61%</sup><br>177 $\rightarrow$ 196 |
| 9            | 2.68  | 0.2089                      | 1.19  | <sup>32%</sup><br>179 $\rightarrow$ 185 | 2.11  | 0.57            | <sup>61%</sup><br>177 $\rightarrow$ 196 |
| 10           | 2.75  | 0.0523                      | 0.62  | <sup>32%</sup><br>179 $\rightarrow$ 185 | 2.21  | 0.54            | <sup>23%</sup><br>182 $\rightarrow$ 197 |

**Table S4.** Computed [zindo (Singlet or Triplet, n states=10)] singlet ( $E_S$ ) and triplet ( $E_T$ ) energies (eV), oscillator strength ( $f$ ), dipole moment ( $\mu$ , D) and singlet-triplet splitting ( $\Delta E_{ST}$ , eV) of DDPBA from NTOs.

| Energy level | $E_S$ | Oscillator strength ( $f$ ) | $\mu$ | NTO Transitions                         | $E_T$ | $\Delta E_{ST}$ | NTO Transitions                         |
|--------------|-------|-----------------------------|-------|-----------------------------------------|-------|-----------------|-----------------------------------------|
| 1            | 1.60  | 0.0067                      | 0.32  | <sup>41%</sup><br>190 $\rightarrow$ 211 | 0.52  | 1.08            | <sup>24%</sup><br>196 $\rightarrow$ 198 |
| 2            | 1.93  | 1.8445                      | 0.83  | <sup>52%</sup><br>196 $\rightarrow$ 197 | 1.60  | 0.33            | <sup>22%</sup><br>195 $\rightarrow$ 197 |
| 3            | 2.06  | 0.5417                      | 0.93  | <sup>35%</sup><br>196 $\rightarrow$ 198 | 1.62  | 0.44            | <sup>20%</sup><br>196 $\rightarrow$ 197 |
| 4            | 2.14  | 0.0015                      | 3.39  | <sup>25%</sup><br>192 $\rightarrow$ 198 | 1.64  | 0.5             | <sup>22%</sup><br>195 $\rightarrow$ 197 |
| 5            | 2.25  | 0.0174                      | 0.40  | <sup>26%</sup><br>189 $\rightarrow$ 211 | 1.75  | 0.5             | <sup>22%</sup><br>195 $\rightarrow$ 197 |
| 6            | 2.32  | 0.3295                      | 3.14  | <sup>22%</sup><br>196 $\rightarrow$ 199 | 1.86  | 0.46            | <sup>24%</sup><br>196 $\rightarrow$ 198 |
| 7            | 2.45  | 0.0075                      | 0.56  | <sup>21%</sup><br>195 $\rightarrow$ 198 | 1.90  | 0.55            | <sup>22%</sup><br>195 $\rightarrow$ 197 |
| 8            | 2.56  | 0.0086                      | 0.56  | <sup>32%</sup><br>195 $\rightarrow$ 197 | 2.03  | 0.53            | <sup>24%</sup><br>196 $\rightarrow$ 198 |
| 9            | 2.67  | 0.3758                      | 0.95  | <sup>18%</sup><br>196 $\rightarrow$ 136 | 2.14  | 0.53            | <sup>20%</sup><br>196 $\rightarrow$ 197 |
| 10           | 2.75  | 0.0185                      | 0.81  | <sup>22%</sup><br>184 $\rightarrow$ 197 | 2.21  | 0.54            | <sup>20%</sup><br>196 $\rightarrow$ 197 |

**Table S5:** Computed hole and electron overlap (S), distance between centroids of hole and electron (D, Å) and dipole moment ( $\mu$ ) for singlet states of DDPPPA.

| State | Hole integral | Electron integral | Integral of transition density | Integral overlap of $h^+ - e^-$ (S) | Centroid of hole (Å) |         |         | Centroid of electron (Å) |         |         | D (Å) | $\mu$ (a.u) |
|-------|---------------|-------------------|--------------------------------|-------------------------------------|----------------------|---------|---------|--------------------------|---------|---------|-------|-------------|
|       |               |                   |                                |                                     | x                    | y       | z       | x                        | y       | z       |       |             |
| S1    | 0.7582        | 0.5047            | -0.0095                        | 0.1775                              | -2.0284              | -3.8305 | 2.1826  | -1.7175                  | -4.1161 | 2.2644  | 0.43  | 0.51        |
| S2    | 0.8782        | 0.7273            | 0.0018                         | 0.5822                              | 4.6385               | 3.5532  | 0.0529  | 5.2460                   | 3.6272  | -0.0100 | 0.61  | 0.93        |
| S3    | 0.8549        | 0.6978            | 0.0003                         | 0.5129                              | 3.4878               | -0.4737 | 0.0012  | 3.3615                   | -0.8073 | -0.0967 | 0.36  | 0.54        |
| S4    | 0.7608        | 0.5662            | 0.0016                         | 0.4827                              | 4.5179               | 4.4771  | 0.0570  | 5.3327                   | 5.5388  | 0.0093  | 1.33  | 1.67        |
| S5    | 0.7420        | 0.5856            | 0.0035                         | 0.3399                              | 1.9813               | -1.5988 | 0.0592  | -0.0506                  | -1.8080 | -0.0315 | 2.04  | 2.56        |
| S6    | 0.7041        | 0.5178            | 0.0010                         | 0.4434                              | 4.1592               | -4.4182 | -0.2014 | 3.6564                   | -4.1301 | -0.2078 | 0.57  | 0.66        |
| S7    | 0.5742        | 0.4369            | 0.0035                         | 0.2966                              | 2.4688               | -0.5593 | 0.1268  | 2.3253                   | -0.7205 | 0.0813  | 0.22  | 0.21        |
| S8    | 0.7232        | 0.6790            | -0.0027                        | 0.1395                              | 2.6389               | 4.5505  | 0.3070  | 4.9704                   | 6.0034  | 0.1086  | 2.75  | 3.64        |
| S9    | 0.7017        | 0.5324            | -0.0054                        | 0.3412                              | -2.0744              | 0.7939  | -0.2136 | -1.1353                  | 0.4840  | 0.0674  | 1.02  | 1.19        |
| S10   | 0.5686        | 0.4170            | -0.0038                        | 0.2914                              | -1.6902              | 0.8456  | -0.0593 | -2.2545                  | 0.4756  | -0.0592 | 0.67  | 0.62        |

**Table S6:** Computed hole and electron overlap (S), distance between centroids of hole and electron (D, Å) and dipole moment ( $\mu$ ) for triplet states of DDPPPA.

| State | Hole integral | Electron integral | Integral of transition density | Integral overlap of $h^+$ - $e^-$ (S) | Centroid of hole (Å) |         |         | Centroid of electron (Å) |         |         | D (Å) | $\mu$ (a.u) |
|-------|---------------|-------------------|--------------------------------|---------------------------------------|----------------------|---------|---------|--------------------------|---------|---------|-------|-------------|
|       |               |                   |                                |                                       | x                    | y       | z       | x                        | y       | z       |       |             |
| T1    | 0.7593        | 0.6111            | 0.0012                         | 0.5229                                | 5.3239               | 5.7740  | 0.0469  | 5.5117                   | 5.7606  | 0.0368  | 0.19  | 0.24        |
| T2    | 0.6974        | 0.5586            | 0.0033                         | 0.4637                                | 4.6972               | -5.7342 | -0.2867 | 4.4411                   | -5.3899 | -0.2474 | 0.43  | 0.51        |
| T3    | 0.4361        | 0.3365            | 0.0020                         | 0.2191                                | -1.3452              | 0.6366  | 0.0619  | -2.1211                  | 0.6907  | 0.0845  | 0.78  | 0.57        |
| T4    | 0.2418        | 0.1731            | -0.0043                        | 0.1276                                | -3.6779              | 0.4487  | -0.3056 | -3.0428                  | 0.0793  | -0.1777 | 0.74  | 0.29        |
| T5    | 0.2237        | 0.1559            | -0.0052                        | 0.1151                                | -3.4828              | -0.2566 | -0.3592 | -3.8496                  | 0.1283  | -0.2165 | 0.55  | 0.20        |
| T6    | 0.6066        | 0.4239            | 0.0055                         | 0.3667                                | 4.4420               | -5.2823 | -0.2400 | 4.3843                   | -4.9832 | -0.2104 | 0.31  | 0.30        |
| T7    | 0.4380        | 0.2813            | 0.0007                         | 0.2510                                | -6.3588              | 1.3311  | -0.1735 | -7.1210                  | 1.0120  | -0.1458 | 0.83  | 0.56        |
| T8    | 0.4706        | 0.2985            | -0.0027                        | 0.2655                                | -7.0105              | 0.7439  | -0.0160 | -8.3512                  | 0.6881  | 0.0629  | 1.34  | 0.98        |
| T9    | 0.7312        | 0.4885            | 0.0094                         | 0.1725                                | -2.0499              | -3.8592 | 2.1945  | -1.7186                  | -4.0136 | 2.2043  | 0.36  | 0.42        |
| T10   | 0.7798        | 0.5377            | -0.0001                        | 0.4836                                | 5.2364               | 5.9467  | 0.0162  | 5.5042                   | 5.8485  | 0.0128  | 0.28  | 0.35        |

**Table S7:** Computed hole and electron overlap (S), distance between centroids of hole and electron (D, Å) and dipole moment ( $\mu$ ) for singlet states of DDPBA.

| State | Hole integral | Electron integral | Integral of transition density | Integral overlap of $h^+ - e^-$ (S) | Centroid of hole (Å) |         |         | Centroid of electron (Å) |         |         | D (Å) | $\mu$ (a.u) |
|-------|---------------|-------------------|--------------------------------|-------------------------------------|----------------------|---------|---------|--------------------------|---------|---------|-------|-------------|
|       |               |                   |                                |                                     | x                    | y       | z       | x                        | y       | z       |       |             |
| S1    | 0.7315        | 0.4866            | -0.0098                        | 0.1722                              | -0.1004              | -4.1282 | 3.3013  | 0.17408                  | -4.1730 | 3.2522  | 0.28  | 0.32        |
| S2    | 0.8669        | 0.7183            | 0.0016                         | 0.5741                              | 5.3817               | 3.7410  | -0.1871 | 5.8856                   | 3.8104  | -0.4112 | 0.55  | 0.83        |
| S3    | 0.8179        | 0.6687            | 0.0003                         | 0.4871                              | 4.6297               | 1.0043  | -0.1194 | 3.9683                   | 0.9793  | -0.1411 | 0.66  | 0.93        |
| S4    | 0.6690        | 0.6553            | 0.0026                         | 0.1241                              | 3.5005               | 4.8091  | 0.7625  | 5.5483                   | 6.3044  | -0.2099 | 2.71  | 3.39        |
| S5    | 0.8271        | 0.6151            | -0.0006                        | 0.5537                              | 5.6641               | 5.7582  | -0.2859 | 5.8251                   | 6.0081  | -0.3272 | 0.30  | 0.40        |
| S6    | 0.7346        | 0.5884            | 0.0065                         | 0.3309                              | 3.3694               | -1.9550 | 0.0880  | 0.8709                   | -2.1188 | 0.3662  | 2.51  | 3.14        |
| S7    | 0.6741        | 0.5022            | 0.0006                         | 0.4078                              | 3.9918               | -1.8714 | -0.2232 | 4.1865                   | -2.3397 | -0.2640 | 0.50  | 0.56        |
| S8    | 0.6741        | 0.5022            | 0.0006                         | 0.4078                              | 3.9918               | -1.8714 | -0.2232 | 4.1865                   | -2.3397 | -0.2640 | 0.50  | 0.56        |
| S9    | 0.6252        | 0.4856            | -0.0042                        | 0.3631                              | 1.0778               | 0.8006  | 0.2322  | 1.9097                   | 0.4323  | 0.3107  | 0.91  | 0.95        |
| S10   | 0.5944        | 0.5098            | -0.0010                        | 0.2346                              | 4.0912               | -4.2746 | -0.0291 | 4.5071                   | -4.4989 | -0.6514 | 0.78  | 0.81        |

**Table S8:** Computed hole and electron overlap (S), distance between centroids of hole and electron (D, Å) and dipole moment ( $\mu$ ) for singlet states of DDPBA.

| State | Hole integral | Electron integral | Integral of transition density | Integral overlap of $h^+ - e^-$ (S) | Centroid of hole (Å) |         |         | Centroid of electron (Å) |         |         | D (Å) | $\mu$ (a.u) |
|-------|---------------|-------------------|--------------------------------|-------------------------------------|----------------------|---------|---------|--------------------------|---------|---------|-------|-------------|
|       |               |                   |                                |                                     | x                    | y       | z       | x                        | y       | z       |       |             |
| T1    | 0.7421        | 0.6001            | -0.0002                        | 0.5101                              | 5.8538               | 6.2305  | -0.2957 | 5.8395                   | 6.1302  | -0.3369 | 0.11  | 0.14        |
| T2    | 0.7055        | 0.5630            | -0.0003                        | 0.4740                              | 5.7616               | -5.1761 | -1.0074 | 5.7379                   | -5.1737 | -0.9329 | 0.08  | 0.09        |
| T3    | 0.4008        | 0.3127            | -0.0051                        | 0.2151                              | 1.5584               | 0.6390  | 0.8530  | 1.0215                   | 0.5173  | 0.8923  | 0.55  | 0.37        |
| T4    | 0.3356        | 0.2333            | -0.0065                        | 0.1829                              | -1.7035              | -0.9262 | 0.6226  | -2.1787                  | -1.1937 | 0.5599  | 0.55  | 0.29        |
| T5    | 0.3180        | 0.2361            | 0.0044                         | 0.1715                              | -4.7701              | 0.5602  | 0.5347  | -3.5841                  | 0.2954  | 0.7936  | 1.24  | 0.65        |
| T6    | 0.5577        | 0.3901            | -0.0030                        | 0.3226                              | 4.6288               | -4.4003 | -0.8903 | 5.0215                   | -4.7702 | -0.8707 | 0.54  | 0.48        |
| T7    | 0.2912        | 0.1933            | -0.0072                        | 0.1507                              | -8.0548              | 1.3346  | -0.6761 | -9.5778                  | 1.6501  | -1.1251 | 1.62  | 0.74        |
| T8    | 0.1888        | 0.1292            | -0.0082                        | 0.0797                              | -3.6189              | 0.4868  | 0.3305  | -3.4437                  | 0.2588  | 0.9597  | 0.69  | 0.21        |
| T9    | 0.5766        | 0.3617            | 0.0006                         | 0.3249                              | -8.9966              | -1.3163 | -1.1419 | -10.0492                 | -1.0531 | -1.3935 | 1.11  | 0.99        |
| T10   | 0.7935        | 0.5462            | -0.0009                        | 0.5051                              | 5.8344               | 6.3749  | -0.3711 | 5.7555                   | 6.2335  | -0.3786 | 0.16  | 0.20        |

**Table S9:** Computed RMSD of electron and hole, H index and t index for singlet states of DDPPPA.

| State | RMSD (Electron) |       |       |       | RMSD (Hole) |       |       |       | H index |       |       | t index |        |        |        |       |
|-------|-----------------|-------|-------|-------|-------------|-------|-------|-------|---------|-------|-------|---------|--------|--------|--------|-------|
|       | x               | y     | z     | total | x           | y     | z     | total | x       | y     | z     | Total   | x      | y      | z      | Total |
| S1    | 1.634           | 1.699 | 1.314 | 2.699 | 1.526       | 1.709 | 0.967 | 2.487 | 1.580   | 1.704 | 1.140 | 2.588   | -1.269 | -1.419 | -1.058 | 2.178 |
| S2    | 2.293           | 5.232 | 0.714 | 5.757 | 2.756       | 4.755 | 0.740 | 5.545 | 2.524   | 4.993 | 0.727 | 5.642   | -1.917 | -4.919 | -0.664 | 5.321 |
| S3    | 4.052           | 5.696 | 0.757 | 7.031 | 3.330       | 5.307 | 0.782 | 6.314 | 3.691   | 5.501 | 0.770 | 6.669   | -3.565 | -5.168 | -0.672 | 6.314 |
| S4    | 2.523           | 3.339 | 0.706 | 4.244 | 3.494       | 4.129 | 0.741 | 5.460 | 3.009   | 3.734 | 0.723 | 4.850   | -2.194 | -2.672 | -0.676 | 3.523 |
| S5    | 4.634           | 3.770 | 0.802 | 6.028 | 3.762       | 4.094 | 0.810 | 5.619 | 4.198   | 3.932 | 0.806 | 5.808   | -2.166 | -3.723 | -0.715 | 4.366 |
| S6    | 3.600           | 4.245 | 0.772 | 5.619 | 2.744       | 4.155 | 0.769 | 5.038 | 3.172   | 4.200 | 0.770 | 5.319   | -2.669 | -3.912 | -0.764 | 4.797 |
| S7    | 3.394           | 4.481 | 0.791 | 5.676 | 3.475       | 4.587 | 0.842 | 5.816 | 3.435   | 4.534 | 0.816 | 5.746   | -3.291 | -4.373 | -0.771 | 5.527 |
| S8    | 1.926           | 2.668 | 0.687 | 3.361 | 1.801       | 2.459 | 0.467 | 3.084 | 1.863   | 2.563 | 0.577 | 3.221   | 0.468  | -1.111 | -0.378 | 1.263 |
| S9    | 4.596           | 3.320 | 0.804 | 5.727 | 5.144       | 3.570 | 0.854 | 6.319 | 4.870   | 3.445 | 0.829 | 6.023   | -3.931 | -3.135 | -0.548 | 5.058 |
| S10   | 4.717           | 3.140 | 0.858 | 5.731 | 5.051       | 3.287 | 0.858 | 6.087 | 4.884   | 3.214 | 0.858 | 5.909   | -4.319 | -2.844 | -0.858 | 5.242 |



**Table S10:** Computed RMSD of electron and hole, H index and t index for triplet states of DDPPPA.

| State | RMSD (Electron) |       |       |       | RMSD (Hole) |       |       |       | H index |       |       | t index |        |        |        |       |
|-------|-----------------|-------|-------|-------|-------------|-------|-------|-------|---------|-------|-------|---------|--------|--------|--------|-------|
|       | x               | y     | z     | total | x           | y     | z     | total | x       | y     | z     | Total   | x      | y      | z      | Total |
| T1    | 2.159           | 2.947 | 0.696 | 3.719 | 2.459       | 2.799 | 0.723 | 3.795 | 2.309   | 2.873 | 0.709 | 3.753   | -2.121 | -2.859 | -0.699 | 3.628 |
| T2    | 2.476           | 3.020 | 0.746 | 3.976 | 2.223       | 2.707 | 0.749 | 3.582 | 2.349   | 2.864 | 0.747 | 3.779   | -2.093 | -2.519 | -0.708 | 3.351 |
| T3    | 4.058           | 2.406 | 0.818 | 4.788 | 4.273       | 2.532 | 0.846 | 5.038 | 4.165   | 2.469 | 0.832 | 4.913   | -3.389 | -2.415 | -0.810 | 4.240 |
| T4    | 4.044           | 2.856 | 0.938 | 5.039 | 4.151       | 3.038 | 0.947 | 5.230 | 4.097   | 2.947 | 0.943 | 5.134   | -3.462 | -2.578 | -0.815 | 4.393 |
| T5    | 4.309           | 3.164 | 0.997 | 5.438 | 3.777       | 3.146 | 0.973 | 5.011 | 4.043   | 3.155 | 0.985 | 5.222   | -3.676 | -2.770 | -0.842 | 4.679 |
| T6    | 2.627           | 3.355 | 0.788 | 4.334 | 2.501       | 3.035 | 0.780 | 4.009 | 2.564   | 3.195 | 0.784 | 4.171   | -2.506 | -2.896 | -0.754 | 3.903 |
| T7    | 4.515           | 2.944 | 1.101 | 5.502 | 5.293       | 3.148 | 1.054 | 6.247 | 4.904   | 3.046 | 1.077 | 5.873   | -4.142 | -2.727 | -1.050 | 5.069 |
| T8    | 3.628           | 2.610 | 1.135 | 4.611 | 5.159       | 2.972 | 1.083 | 6.052 | 4.393   | 2.791 | 1.109 | 5.322   | -3.053 | -2.735 | -1.030 | 4.226 |
| T9    | 1.783           | 1.890 | 1.373 | 2.938 | 1.495       | 1.659 | 0.956 | 2.430 | 1.639   | 1.774 | 1.165 | 2.682   | -1.308 | -1.620 | -1.155 | 2.381 |
| T10   | 2.475           | 2.669 | 0.707 | 3.708 | 3.287       | 2.375 | 0.755 | 4.125 | 2.881   | 2.522 | 0.731 | 3.898   | -2.613 | -2.424 | -0.727 | 3.638 |

**Table S11:** Computed RMSD of electron and hole, H index and t index for singlet states of DDPBA

| State | RMSD (Electron) |       |       |       | RMSD (Hole) |       |       |       | H index |       |       | t index |        |        |        |       |
|-------|-----------------|-------|-------|-------|-------------|-------|-------|-------|---------|-------|-------|---------|--------|--------|--------|-------|
|       | x               | y     | z     | total | x           | y     | Z     | total | x       | y     | z     | Total   | x      | Y      | Z      | Total |
| S1    | 1.660           | 1.924 | 1.473 | 2.938 | 1.435       | 1.677 | 1.132 | 2.481 | 1.548   | 1.801 | 1.303 | 2.708   | -1.273 | -1.756 | -1.253 | 2.505 |
| S2    | 2.171           | 5.423 | 1.111 | 5.946 | 2.464       | 4.943 | 1.187 | 5.649 | 2.318   | 5.183 | 1.149 | 5.792   | -1.814 | -5.113 | -0.925 | 5.504 |
| S3    | 4.442           | 5.673 | 1.375 | 7.335 | 3.297       | 5.437 | 1.324 | 6.495 | 3.869   | 5.555 | 1.349 | 6.903   | -3.208 | -5.530 | -1.328 | 6.530 |
| S4    | 2.660           | 2.791 | 1.006 | 3.984 | 1.505       | 2.085 | 0.601 | 2.641 | 2.082   | 2.438 | 0.804 | 3.305   | -0.034 | -0.943 | 0.169  | 0.958 |
| S5    | 2.469           | 3.169 | 0.967 | 4.132 | 2.662       | 3.523 | 1.036 | 4.536 | 2.565   | 3.346 | 1.002 | 4.334   | -2.404 | -3.096 | -0.960 | 4.036 |
| S6    | 5.363           | 3.553 | 1.562 | 6.620 | 4.018       | 3.904 | 1.463 | 5.790 | 4.690   | 3.728 | 1.512 | 6.179   | -2.192 | -3.564 | -1.234 | 4.362 |
| S7    | 3.778           | 4.559 | 1.326 | 6.068 | 4.155       | 4.676 | 1.402 | 6.411 | 3.967   | 4.618 | 1.364 | 6.238   | -3.772 | -4.149 | -1.323 | 5.761 |
| S8    | 3.778           | 4.559 | 1.326 | 6.068 | 4.155       | 4.676 | 1.402 | 6.411 | 3.967   | 4.618 | 1.364 | 6.238   | -3.772 | -4.149 | -1.323 | 5.761 |
| S9    | 5.127           | 4.379 | 1.387 | 6.884 | 5.977       | 4.273 | 1.346 | 7.470 | 5.552   | 4.326 | 1.366 | 7.170   | -4.720 | -3.958 | -1.288 | 6.293 |
| S10   | 4.198           | 3.582 | 1.219 | 5.652 | 2.315       | 2.410 | 1.092 | 3.516 | 3.257   | 2.996 | 1.156 | 4.574   | -2.841 | -2.772 | -0.533 | 4.005 |

**Table S12:** Computed RMSD of electron and hole, H index and t index for triplet states of DDPBA.

| State | RMSD (Electron) |       |       |       | RMSD (Hole) |       |       |       | H index |       |       | t index |        |        |        |       |
|-------|-----------------|-------|-------|-------|-------------|-------|-------|-------|---------|-------|-------|---------|--------|--------|--------|-------|
|       | x               | y     | z     | total | x           | y     | z     | total | x       | y     | z     | Total   | x      | y      | z      | Total |
| T1    | 2.624           | 3.094 | 1.037 | 4.187 | 2.364       | 2.862 | 1.057 | 3.859 | 2.494   | 2.978 | 1.047 | 4.023   | -2.480 | -2.877 | -1.006 | 3.929 |
| T2    | 2.842           | 2.894 | 1.190 | 4.227 | 3.136       | 3.035 | 1.143 | 4.512 | 2.989   | 2.964 | 1.167 | 4.368   | -2.965 | -2.962 | -1.092 | 4.331 |
| T3    | 4.110           | 2.814 | 1.180 | 5.119 | 3.858       | 2.629 | 1.118 | 4.801 | 3.984   | 2.721 | 1.149 | 4.960   | -3.447 | -2.599 | -1.110 | 4.458 |
| T4    | 4.604           | 2.831 | 1.280 | 5.554 | 4.463       | 3.129 | 1.224 | 5.586 | 4.534   | 2.980 | 1.252 | 5.568   | -4.058 | -2.712 | -1.189 | 5.024 |
| T5    | 5.189           | 2.550 | 1.215 | 5.908 | 5.504       | 2.271 | 1.256 | 6.085 | 5.346   | 2.411 | 1.235 | 5.993   | -4.160 | -2.146 | -0.976 | 4.782 |
| T6    | 4.224           | 3.042 | 1.239 | 5.351 | 4.932       | 3.623 | 1.256 | 6.247 | 4.578   | 3.333 | 1.247 | 5.798   | -4.185 | -2.963 | -1.228 | 5.273 |
| T7    | 4.955           | 2.624 | 1.285 | 5.752 | 5.826       | 2.598 | 1.480 | 6.549 | 5.390   | 2.611 | 1.383 | 6.147   | -3.867 | -2.295 | -0.934 | 4.593 |
| T8    | 4.940           | 2.558 | 1.415 | 5.741 | 6.268       | 3.113 | 1.451 | 7.148 | 5.604   | 2.836 | 1.433 | 6.442   | -5.429 | -2.608 | -0.804 | 6.076 |
| T9    | 4.760           | 2.275 | 1.311 | 5.436 | 5.536       | 2.228 | 1.452 | 6.142 | 5.148   | 2.251 | 1.382 | 5.786   | -4.095 | -1.988 | -1.130 | 4.691 |
| T10   | 3.197           | 2.734 | 1.092 | 4.346 | 2.988       | 2.532 | 1.108 | 4.071 | 3.093   | 2.633 | 1.100 | 4.208   | -3.014 | -2.492 | -1.093 | 4.060 |

**Table S13.** Transferred charges ( $q_{CT}$ ), barycentres of electron density loss ( $R_+$ ) /gain ( $R_-$ ), distance between two barycenters ( $D_{CT}$ ), dipole moment of CT ( $\mu_{CT}$ ), RMSD of +ve/-ve parts, CT indices (H & t) and overlap integral of C+/C- of DDPPPA and DDPBA.

| Blue emissive & Host materials | $q_{CT}$<br>$ e^{-1} $ | $R_+$ (Å) |        |        | $R_-$ (Å) |       |        | $D_{CT}$ (Å) | $\mu_{CT}$ (D) | RMSD of +ve parts | RMSD of -ve parts | H / t indices (Å) | overlap integral of C+/ C- |
|--------------------------------|------------------------|-----------|--------|--------|-----------|-------|--------|--------------|----------------|-------------------|-------------------|-------------------|----------------------------|
|                                |                        | x         | y      | z      | x         | y     | z      |              |                |                   |                   |                   |                            |
| DDPPPA                         | 0.001 -0.001           | 0.495     | -0.333 | -0.049 | -0.634    | 0.079 | -0.059 | 1.201        | 0.003          | 13.681            | 14.152            | 7.349/6.232       | 0.9843                     |
| DDPBA                          | 28.743 -31.645         | 1.862     | 0.427  | 0.141  | 1.518     | 0.177 | 0.084  | 0.429        | 59.228         | 15.303            | 15.101            | 8.044/7.619       | 0.9985                     |

**Table S14:** Computed excitation energy (eV), excitation coefficient and  $\Delta r$  intex ( $\text{\AA}$ ) for singlet and triplet states of DDPPPA.

| State | Singlet           |                        |                  | Triplet           |                        |                  |
|-------|-------------------|------------------------|------------------|-------------------|------------------------|------------------|
|       | Excitation energy | Excitation coefficient | $\Delta r$ intex | Excitation energy | Excitation coefficient | $\Delta r$ intex |
| 1     | 1.4792            | 0.4317                 | 1.4535           | 0.7114            | 0.3673                 | 2.4455           |
| 2     | 1.6881            | 0.4326                 | 2.8688           | 1.4713            | 0.3357                 | 2.0751           |
| 3     | 1.8839            | 0.4199                 | 2.2411           | 1.5913            | 0.2137                 | 4.5605           |
| 4     | 2.0477            | 0.3606                 | 4.8958           | 1.6878            | 0.1148                 | 2.8195           |
| 5     | 2.2623            | 0.3637                 | 4.7740           | 1.7704            | 0.1061                 | 2.0219           |
| 6     | 2.3528            | 0.3303                 | 3.5192           | 1.8637            | 0.2748                 | 4.0050           |
| 7     | 2.4766            | 0.2800                 | 4.0004           | 1.9238            | 0.1925                 | 3.1772           |
| 8     | 2.5467            | 0.4109                 | 4.3088           | 2.0111            | 0.2067                 | 2.1976           |
| 9     | 2.6840            | 0.3369                 | 3.6357           | 2.1071            | 0.4169                 | 1.3995           |
| 10    | 2.7524            | 0.2697                 | 3.6255           | 2.2095            | 0.3525                 | 4.0757           |

**Table S15:** Computed excitation energy (eV), excitation coefficient and  $\Delta r$  intex ( $\text{\AA}$ ) for singlet and triplet states of DDPBA.

| State | Singlet           |                        |                  | Triplet           |                        |                  |
|-------|-------------------|------------------------|------------------|-------------------|------------------------|------------------|
|       | Excitation energy | Excitation coefficient | $\Delta r$ intex | Excitation energy | Excitation coefficient | $\Delta r$ intex |
| 1     | 1.5982            | 0.4157                 | 1.7116           | 0.5251            | 0.3602                 | 2.5285           |
| 2     | 1.9339            | 0.4274                 | 2.8689           | 1.5982            | 0.3385                 | 2.3470           |
| 3     | 2.0592            | 0.4015                 | 2.2620           | 1.6194            | 0.1964                 | 4.6522           |
| 4     | 2.1407            | 0.3936                 | 4.0429           | 1.6458            | 0.1585                 | 2.9743           |
| 5     | 2.2479            | 0.3901                 | 4.7118           | 1.7502            | 0.1520                 | 3.5574           |
| 6     | 2.3200            | 0.3593                 | 5.0110           | 1.8613            | 0.2548                 | 4.8475           |
| 7     | 2.4476            | 0.3316                 | 4.6645           | 1.8998            | 0.1336                 | 3.3529           |
| 8     | 2.5636            | 0.3222                 | 5.0707           | 2.0283            | 0.0877                 | 3.9288           |
| 9     | 2.6706            | 0.3038                 | 4.1859           | 2.1363            | 0.2490                 | 2.5348           |
| 10    | 2.7499            | 0.3173                 | 4.1176           | 2.2086            | 0.3590                 | 5.7523           |
